# Supplementary material for: Oncogene-addicted solid tumors and microbiome—lung cancer as a main character: a narrative review
Source: PubMed Central journal article supplement — Transl Lung Cancer Res. 2024 Aug 6;13(8):2050–66. doi: 10.21037/tlcr-24-216 (PMC11384476; doi:10.21037/tlcr-24-216), 2024-08-06
Supplement: tlcr-13-08-2050-prf.pdf [file tlcr-13-08-2050-prf.pdf]

## Peer Review File

Article information: <https://dx.doi.org/10.21037/tlcr-24-216>

### Reviewer A

This review aims to provide an overview of the relationship between microbiota, daily habits, the immune system, and oncogene-addicted tumors.

**Comment 1:** In the end, this review is quite complete; however, it is missing some really important studies/comments which are neither mentioned nor referenced such as:

- Greathouse et al. 2018
  - Parker et al. 2022
  - Greathouse et al., 2020
- etc.

**Reply 1:** We have added relevant articles.

Changes in the text: Page 8, references 53 and 56

**Comment 2:** In addition, intracellular bacteria are not mentioned at all.

- Nejman et al. 2020
- etc.

**Reply 2:** We have included intracellular bacteria

Changes in the text: Page 8 Lines 230-236, and a conclusion in the same section Lines 237-242

**Comment 3:** The relationship between microbiota and the immune system in the context of lung cancer is discussed a little quickly (on purpose?).

**Reply 3:** on purpose, to discuss immune system and microbiota as a whole, and discussing the available evidence on carcinogenesis, immune system and tumor microenvironment. We decided to focus on lung cancer in the following section (section 2).

**Comment 4:** Finally, there are several typographical or sentence errors. Some sentences are difficult to understand and must be modified to make the text easier to read.

For example (but not limited to):

-67-69

-110-112

-189

-209

-241

-267

etc.

**Reply 4:** We have revised the text and made the changes suggested, as well as included some other changes for better comprehension

### **Reviewer B**

This is an excellent systematic review, very clearly written with extensive research done.

Minor comments:

**Comment 1:** The conclusions could be more directive.

**Reply 1:** We have changed the conclusions to make them more directive

Changes in the text: Page 17, the conclusion was rearranged and shortened.

**Comment 2:** I am missing a methods section.

**Reply 2:** We have included a methods section including the search strategy summary table.

Changes in the text: Page 4
