# Supplementary material for: Oncogene-addicted solid tumors and microbiome—lung cancer as a main character: a narrative review
Source: PubMed Central journal article supplement — Transl Lung Cancer Res. 2024 Aug 6;13(8):2050–66. doi: 10.21037/tlcr-24-216 (PMC11384476; doi:10.21037/tlcr-24-216), 2024-08-06
Supplement: tlcr-13-08-2050-rc.pdf [file tlcr-13-08-2050-rc.pdf]

## Narrative Review Checklist

| Section/Topic             | Item No | Item                                                                                                                                                                               | Reported on Page Number/Line Number           | Reported on Section/Paragraph         |
|---------------------------|---------|------------------------------------------------------------------------------------------------------------------------------------------------------------------------------------|-----------------------------------------------|---------------------------------------|
| <b>TITLE</b>              |         |                                                                                                                                                                                    |                                               |                                       |
| Title                     | 1       | Identify the report as a Narrative Review or Literature Review.                                                                                                                    | Page 1/Line 2                                 | Title                                 |
| <b>ABSTRACT</b>           |         |                                                                                                                                                                                    |                                               |                                       |
| Structured summary        | 2       | Provide a structured summary with the subsections as: Background and Objective, Methods, Key Content and Findings, Conclusions.                                                    | Page 2/ Lines 38-61                           | Abstract                              |
| <b>INTRODUCTION</b>       |         |                                                                                                                                                                                    |                                               |                                       |
| Rationale/background      | 3       | Describe the rationale for the review in the context of what is already known.                                                                                                     | Page 3 and 4/ Lines 68-113                    | Introduction section a) and b)        |
| Objectives                | 4       | Specify the key question(s) identified for the review topic.                                                                                                                       | Page 4/ Lines 115-119                         | Introduction section c)               |
| <b>METHODS</b>            |         |                                                                                                                                                                                    |                                               |                                       |
| Research selection        | 5       | Specify the process for identifying the literature search (eg, years considered, language, publication status, study design, and databases of coverage).                           | Page 4/ Line 121                              | Methods and Table 1                   |
| <b>DISCUSSION/SUMMARY</b> |         |                                                                                                                                                                                    |                                               |                                       |
| Narrative                 | 6       | Discuss: 1) research reviewed including fundamental or key findings, 2) limitations and/or quality of research reviewed, and 3) need for future research.                          | Page 9/Lines 239-468<br>Page 16/Lines 470-477 | 1)Section 3-4-5<br>2 and 3) Section 5 |
| Summary                   | 7       | Provide an overall interpretation of the narrative review in the context of clinical practice for health professionals, policy development and implementation, or future research. | Page 16/Lines 480-491                         | Conclusion                            |

Article information: <https://dx.doi.org/10.21037/tlcr-24-216>

\*As the checklist was provided upon initial submission, the page number/line number reported may be changed due to copy editing and may not be referable in the published version. In this case, the section/paragraph may be used as an alternative reference.
